# Supplementary material for: Efficacy of common salvage chemotherapy regimens in patients with refractory or relapsed acute myeloid leukemia: A retrospective cohort study
Source: PubMed Central journal article supplement — Medicine (Baltimore). 2018 Sep 28;97(39):e12102. doi: 10.1097/MD.0000000000012102 (PMC6181529; doi:10.1097/md.0000000000012102), 2018-09-28
Supplement: medi-97-e12102-s001.pdf [file medi-97-e12102-s001.pdf]

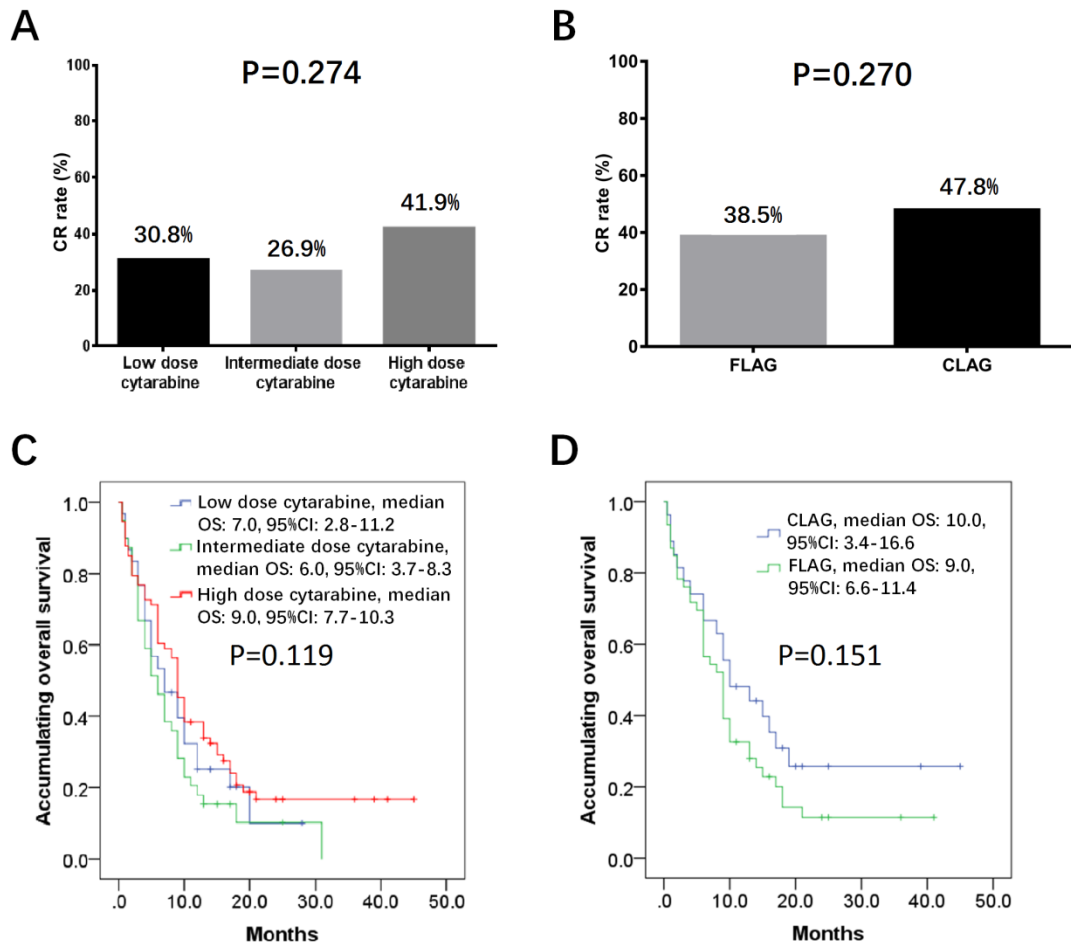

**Supplementary Figure 1.** Treatment response in groups classified by dose and comparison of outcomes between CLAG and FLAG regimens. **(A)** No difference of CR was found among low dose cytarabine group, intermediate cytarabine group and high cytarabine group; **(B)** No difference of CR was observed between CLAG group and FLAG group; **(C)** No difference of OS was found among low dose cytarabine group, intermediate cytarabine group and high cytarabine group; **(D)** No difference of OS was observed between CLAG group and FLAG group. Comparison among groups were performed with Chi-squared test and log-rank test.  $P < 0.05$  was considered significant.

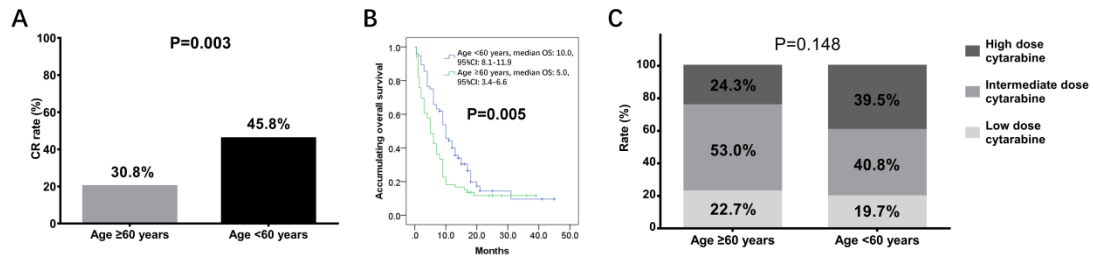

**Supplementary Figure 2.** Treatment outcomes in groups classified by age. **(A)** CR in patients with age  $\geq 60$  years was reduced compared to patients with age < 60 years; **(B)** OS in patients with age  $\geq 60$  years was decreased compared to patients with age < 60 years; **(C)** No difference of rate in high dose cytarabine, intermediate dose cytarabine and low dose cytarabine was observed between patients with age  $\geq 60$  years and patients with age < 60 years. Comparison between groups were performed with Chi-squared test, log-rank test and Wilcoxon rank sum test.  $P < 0.05$  was considered significant.

**Supplementary Table 1.** Adverse events

| Items                      | FLAG<br>(n=46) | CAG/DAG<br>(n=30) | CLAG<br>(n=27) | MEA<br>(n=17) | IA/DA/MA<br>(n=12) | HAA/HAD<br>(n=10) |
|----------------------------|----------------|-------------------|----------------|---------------|--------------------|-------------------|
| Febrile neutropenia (n/%)  | 41 (89.1)      | 25 (83.3)         | 23 (85.2)      | 14 (82.4)     | 10 (83.3)          | 8 (80.0)          |
| Thrombocytopenia (n/%)     | 40 (87.0)      | 26 (86.7)         | 21 (77.8)      | 11 (64.7)     | 8 (66.7)           | 7 (70.0)          |
| Infection (n/%)            | 31 (67.4)      | 19 (63.3)         | 18 (66.7)      | 5 (29.4)      | 4 (33.3)           | 6 (60.0)          |
| Hemorrhage (n/%)           | 22 (46.8)      | 4 (13.3)          | 8 (29.6)       | 5 (29.4)      | 2 (16.7)           | 3 (30.0)          |
| ALT or AST elevation (n/%) | 6 (13.0)       | 2 (6.7)           | 2 (7.4)        | 4 (23.5)      | 0 (0.0)            | 0 (0.0)           |
| Cardiotoxicity (n/%)       | 2 (4.3)        | 0 (0.0)           | 1 (3.7)        | 1 (5.9)       | 1 (8.3)            | 1 (10.0)          |
| Nausea/vomiting (n/%)      | 16 (34.8)      | 7 (23.3)          | 13 (48.1)      | 2 (11.7)      | 1 (8.3)            | 4 (40.0)          |
| Others (n/%)               | 5 (10.9)       | 2 (6.7)           | 4 (14.8)       | 2 (11.7)      | 2 (16.7)           | 2 (20.0)          |

Data were presented as count (%). ALT = alanine aminotransferase, AST = aspartate aminotransferase.
